# Supplementary material for: Partial filling affinity capillary electrophoresis including adsorption energy distribution calculations – towards reliable and feasible biomolecular interaction studies
Source: Royal Society of Chemistry journal article supplement (doi:10.1039/c5an00210a), 2015-01-01
Supplement: c5an00210a1.pdf [file c5an00210a1.pdf]

## **Partial Filling Affinity Capillary Electrophoresis including Adsorption Energy Distribution Calculations – Towards Reliable and Feasible Biomolecular Interaction Studies**

Joanna Witos,<sup>a</sup> Jörgen Samuelsson,<sup>b</sup> Geraldine Cilpa-Karhu,<sup>a</sup> Jari Metso,<sup>c</sup> Matti Jauhiainen,<sup>c</sup> Marja-Liisa Riekkola<sup>\*a</sup>

<sup>a</sup> *Laboratory of Analytical Chemistry, Department of Chemistry, P.O. Box 55, FIN-00014 University of Helsinki, Finland.*

*Tel: +358-40 5058848, E-mail: marja-liisa.riekkola@helsinki.fi*

<sup>b</sup> *Department of Engineering and Chemical Sciences, Karlstad University, SE-651 88 Karlstad, Sweden*

<sup>c</sup> *National Institute for Health and Welfare, Public Health Genomics Unit, Biomedicum, FIN-00290 Helsinki, Finland.*

## Supporting information

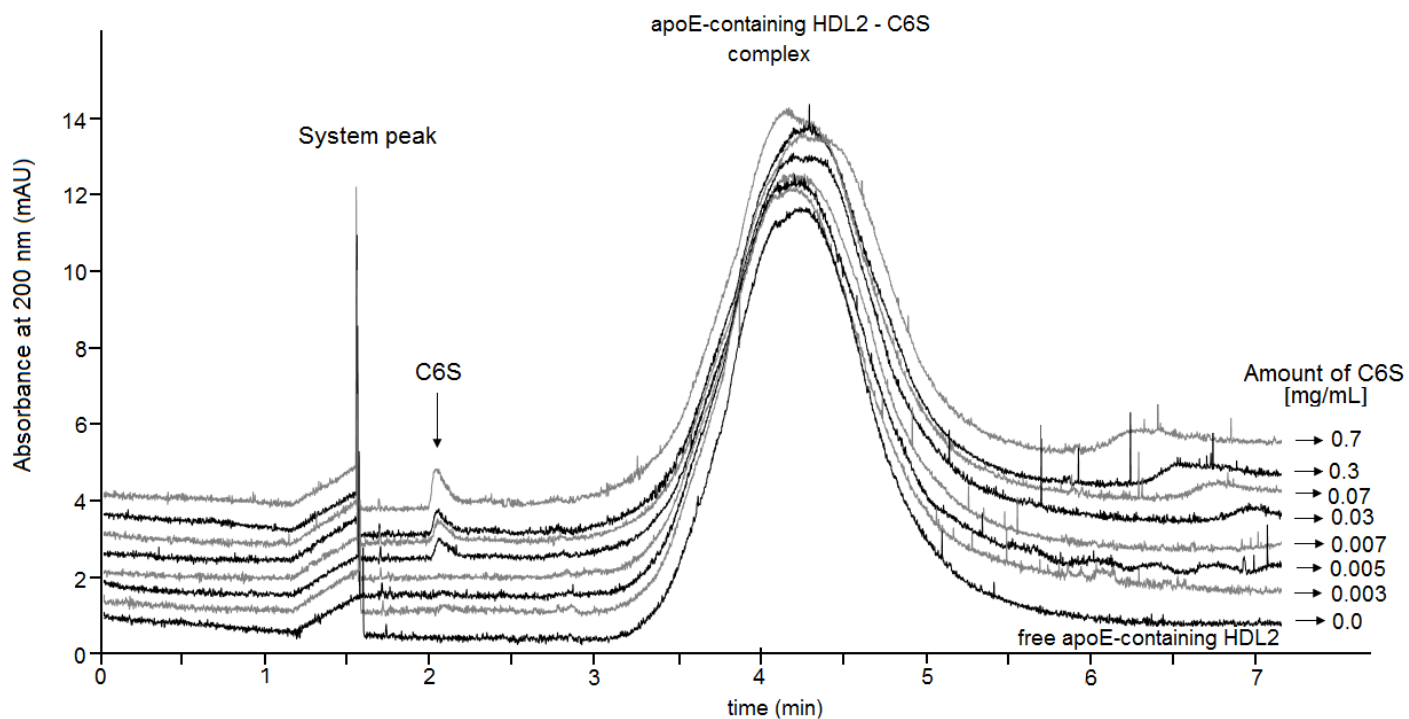

**Figure S1.** Electropherogram obtained by affinity capillary electrophoresis with partial filled technique are presented as a function of increased concentration of C6S interacting with HDL<sub>2</sub> including apoE. Running conditions: -25 kV, injection time of HDL<sub>2</sub> (containing apoE) 2 s at 50 mbar, injection time of C6S 3 s at 50 mbar, 25 °C,  $L_{\text{tot}}$  38.5 cm,  $L_{\text{det}}$  30 cm, UV detection 200 nm, BGE phosphate buffer (pH 7.4, I 20mM), and C6S concentration ranging from 0.0 mg/mL to 1.0 mg/mL.

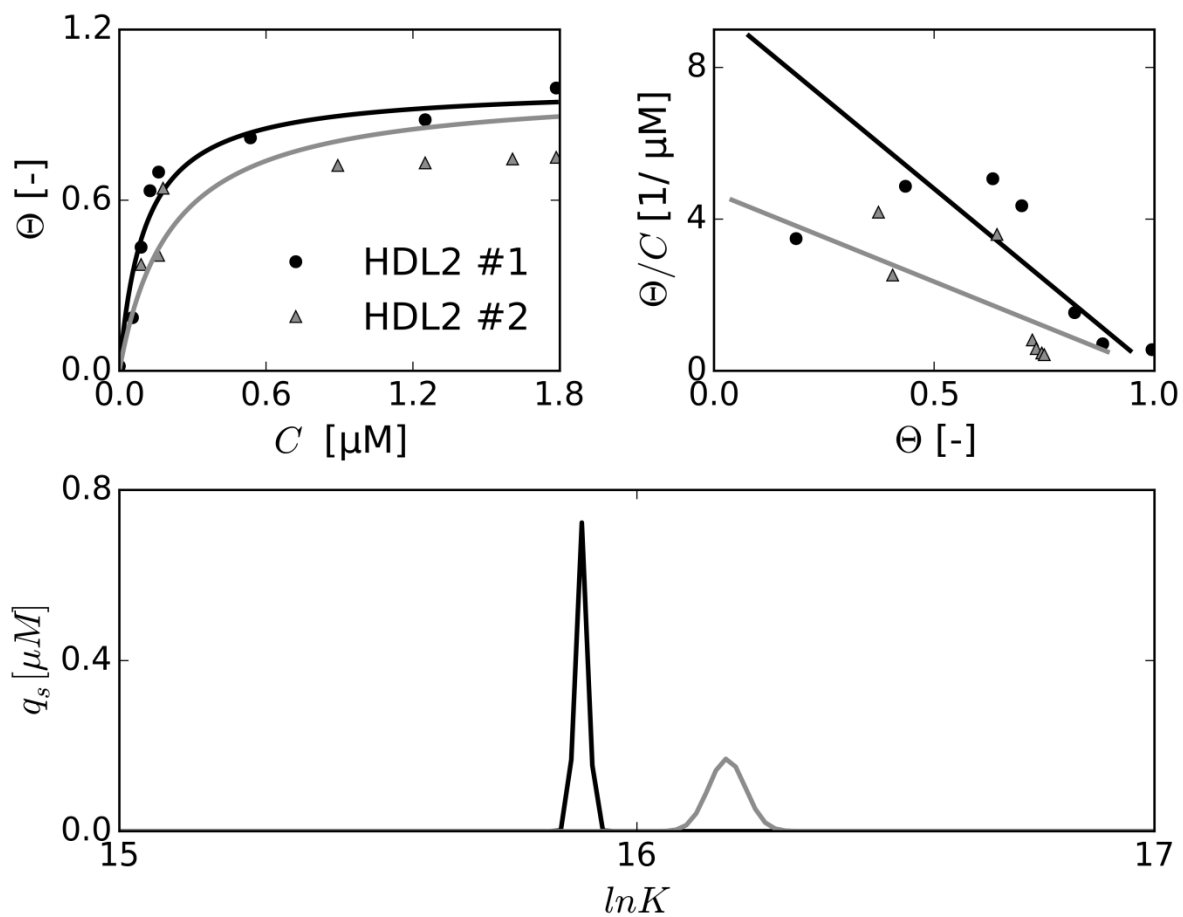

**Figure S2.** (A) Adsorption isotherm of HDL<sub>2</sub> including apoE, (B) corresponding Scatchard plot and (C) AED calculations for HDL<sub>2</sub> including apoE-C6S system at 25 °C.
